# Supplementary material for: Beyond Binary: (Re)Defining “Gender” for 21st Century Disaster Risk Reduction Research, Policy, and Practice
Source: MDPI journal article supplement (doi:10.3390/ijerph16203984), 2019-10-18
Supplement: s1 [file s1]

**Supplementary Material:**

**File S1. Included papers (*n* = 260).**

*Asterix (\*) denotes journal article that appear to utilise sex and gender terms interchangeably.*

| First Author Surname (A-Z) | YEAR | Title of Journal Article                                                                                                                                | More than 2 Genders | Sex/ Sexes | Female | Male | Woman/W omen | Man/ Men | Wife | Husband | Gay/Homosexual |
|----------------------------|------|---------------------------------------------------------------------------------------------------------------------------------------------------------|---------------------|------------|--------|------|--------------|----------|------|---------|----------------|
| Adams*                     | 2015 | Comorbidity of PTSD, Major Depression, and Substance Use Disorder Among Adolescent Victims of the Spring 2011 Tornadoes in Alabama and Joplin, Missouri |                     |            | YES    | YES  |              |          |      |         |                |
| Adeagbo*                   | 2016 | Effects of natural disasters on social and economic well being: A study in Nigeria                                                                      |                     |            | YES    | YES  | YES          | YES      |      |         |                |
| Aitken*                    | 2015 | Emergency Department Presentations following Tropical Cyclone Yasi                                                                                      |                     |            | YES    | YES  |              |          |      |         |                |
| Akerkar                    | 2017 | Gender, place and mental health recovery in disasters: Addressing issues of equality and difference                                                     |                     |            |        |      | YES          | YES      |      |         |                |
| Alshehri                   | 2016 | Public perceptions and attitudes to biological risks: Saudi Arabia and regional perspectives                                                            |                     |            |        |      | YES          | YES      |      |         |                |
| Andersen*                  | 2016 | Gender and Climate Change in Latin America: An Analysis of Vulnerability, Adaptation and Resilience Based on Household Surveys                          |                     |            | YES    | YES  | YES          | YES      |      |         |                |
| Ardagh*                    | 2015 | A sex disparity among Earthquake Victims                                                                                                                |                     | YES        | YES    | YES  | YES          | YES      |      |         |                |
| Armas*                     | 2017 | Self-efficacy, stress, and locus of control: The psychology of earthquake risk perception in Bucharest, Romania                                         |                     | YES        |        |      | YES          | YES      |      |         |                |

|                    |      |                                                                                                                                               |  |     |     |     |     |     |  |  |  |
|--------------------|------|-----------------------------------------------------------------------------------------------------------------------------------------------|--|-----|-----|-----|-----|-----|--|--|--|
| <b>Arnberg</b>     | 2015 | Posttraumatic stress in survivors 1 month to 19 years after an airliner emergency landing                                                     |  | YES | YES | YES |     |     |  |  |  |
| <b>Asif Malik</b>  | 2018 | Prevalence of depression in earthquake 2005 affected areas of Muzaffarabad City (Azad Kashmir)                                                |  | YES | YES | YES |     |     |  |  |  |
| <b>Ahsan*</b>      | 2016 | Burr Hole Evacuation of Extradural Hematoma in Mass Trauma. A Life Saving and Time Saving Procedure: Our Experience in the Earthquake of 2005 |  |     | YES | YES |     |     |  |  |  |
| <b>Austin</b>      | 2016 | Disaster devastation in poor nations: The direct and indirect effects of gender equality, ecological losses, and development                  |  |     |     |     | YES | YES |  |  |  |
| <b>Abdurrahman</b> | 2015 | Neurosurgical Injuries Caused by the 2011 Van Earthquake: The Experience at the Van Regional Training and Research Hospital                   |  | YES | YES | YES |     |     |  |  |  |
| <b>Ayub*</b>       | 2015 | Rate and predictors of psychotic symptoms after Kashmir earthquake                                                                            |  |     | YES | YES | YES | YES |  |  |  |
| <b>Bala*</b>       | 2017 | Sentiment trends on natural disasters using location based twitter opinion mining                                                             |  |     | YES | YES |     |     |  |  |  |
| <b>Ballera</b>     | 2015 | Management of the dead in Tacloban City after Typhoon Haiyan                                                                                  |  | YES | YES | YES |     |     |  |  |  |
| <b>Ben Khelil*</b> | 2017 | A comparison of suicidal behavior by burns five years before and five years after the 2011 Tunisian Revolution                                |  | YES | YES | YES |     |     |  |  |  |
| <b>Bhandari*</b>   | 2017 | Psychological distress among the adult survivors of Kathmandu valley from Nepal's 2015 earthquake                                             |  |     | YES | YES |     |     |  |  |  |
| <b>Bhattarai*</b>  | 2018 | Determinants of resilience among people who sustained                                                                                         |  |     | YES | YES |     |     |  |  |  |

|                   |      |                                                                                                                               |     |     |     |     |     |     |  |
|-------------------|------|-------------------------------------------------------------------------------------------------------------------------------|-----|-----|-----|-----|-----|-----|--|
|                   |      | spinal cord injury from the 2015 earthquake in Nepal                                                                          |     |     |     |     |     |     |  |
| <b>Bianchini*</b> | 2017 | Moderate Depression Promotes Posttraumatic Growth (Ptg): A Young Population Survey 2 Years after the 2009 L'Aquila Earthquake |     |     | YES | YES |     |     |  |
| <b>Bolt*</b>      | 2018 | The Associations between Self-Reported Exposure to the Chernobyl Nuclear Disaster Zone and Mental Health Disorders in Ukraine |     | YES | YES | YES | YES | YES |  |
| <b>Bradshaw</b>   | 2015 | Gendered Rights in the Post-2015 Development and Disasters Agendas                                                            |     |     |     |     | YES | YES |  |
| <b>Cadichon*</b>  | 2017 | Symptoms of PTSD Among Adolescents and Young Adult Survivors Six Years after the 2010 Haiti Earthquake                        |     | YES | YES | YES | YES | YES |  |
| <b>Gaillard</b>   | 2017 | Beyond men and women: a critical perspective on gender and disaster                                                           | YES |     |     |     | YES | YES |  |
| <b>Bradshaw</b>   | 2015 | Engendering development and disasters                                                                                         |     |     |     |     | YES | YES |  |
| <b>Moreno</b>     | 2016 | Disaster Resilience: Addressing Gender Disparities                                                                            |     |     |     |     | YES | YES |  |
| <b>Chen*</b>      | 2016 | A 10-year follow-up study on suicidal mortality after 1999 Taiwan earthquake                                                  |     |     | YES | YES |     |     |  |
| <b>Felix*</b>     | 2019 | Addressing Disaster Exposure Measurement Issues With Latent Class Analysis                                                    |     |     | YES | YES |     |     |  |
| <b>Chiang*</b>    | 2017 | Adjunctive hyperbaric oxygen therapy in severe burns: Experience in Taiwan Formosa Water Park dust explosion disaster         |     | YES | YES | YES | YES | YES |  |
| <b>Danielson*</b> | 2017 | Adolescent Substance Use Following a Deadly U.S. Tornado Outbreak: A                                                          |     |     | YES | YES | YES | YES |  |

|                   |      |                                                                                                                                                    |     |  |     |     |     |     |  |  |  |
|-------------------|------|----------------------------------------------------------------------------------------------------------------------------------------------------|-----|--|-----|-----|-----|-----|--|--|--|
|                   |      | Population-Based Study of 2,000 Families                                                                                                           |     |  |     |     |     |     |  |  |  |
| <b>Campbell*</b>  | 2016 | Violence and abuse of internally displaced women survivors of the 2010 Haiti earthquake                                                            |     |  | YES | YES | YES | YES |  |  |  |
| <b>Cao*</b>       | 2016 | DSM-5 Posttraumatic Stress Disorder Symptom Structure in Disaster-Exposed Adolescents: Stability across Gender and Relation to Behavioral Problems |     |  | YES | YES |     |     |  |  |  |
| <b>Cao*</b>       | 2017 | Real-time Acute Stress Facilitates Allocentric Spatial Processing in a Virtual Fire Disaster                                                       |     |  | YES | YES |     |     |  |  |  |
| <b>Carmassi*</b>  | 2015 | Impact of DSM-5 PTSD and gender on impaired eating behaviors in 512 Italian earthquake survivors                                                   | YES |  | YES | YES | YES | YES |  |  |  |
| <b>Casey</b>      | 2015 | Evaluations of reproductive health programs in humanitarian settings: a systematic review                                                          |     |  |     |     | YES | YES |  |  |  |
| <b>Chang*</b>     | 2017 | Comorbid diseases as risk factors for incident posttraumatic stress disorder (PTSD) in a large community cohort (KCIS no.PSY4)                     | YES |  | YES | YES | YES | YES |  |  |  |
| <b>Chaudhary*</b> | 2017 | Humanitarian response to reproductive and sexual health needs in a disaster: the Nepal Earthquake 2015 case study                                  |     |  | YES | YES | YES | YES |  |  |  |
| <b>Chen*</b>      | 2018 | A Correlational Study of Acute Stress and Resilience Among Hospitalized Burn Victims Following the Taiwan Formosa Fun Coast Explosion              |     |  | YES | YES |     |     |  |  |  |
| <b>Chui*</b>      | 2017 | Predictive factors of depression symptoms among adolescents in the 18-month follow-up after Wenchuan earthquake in China                           | YES |  | YES | YES |     |     |  |  |  |
| <b>Chung*</b>     | 2017 | Gender-sensitive disaster vulnerability using analytic                                                                                             |     |  | YES | YES | YES | YES |  |  |  |

|                   |      |                                                                                                                                                                               |     |     |     |     |     |  |  |  |
|-------------------|------|-------------------------------------------------------------------------------------------------------------------------------------------------------------------------------|-----|-----|-----|-----|-----|--|--|--|
|                   |      | hierarchy process and genetic algorithm                                                                                                                                       |     |     |     |     |     |  |  |  |
| <b>Chunpeng*</b>  | 2017 | Prenatal Earthquake Exposure and Midlife Uric Acid Levels Among Chinese Adults                                                                                                | YES |     | YES | YES | YES |  |  |  |
| <b>Ciocca*</b>    | 2015 | Post-traumatic stress disorder, coping strategies and type 2 diabetes: psychometric assessment after L'Aquila earthquake                                                      |     | YES | YES | YES | YES |  |  |  |
| <b>Codreanu*</b>  | 2015 | Factors Associated with Discussion of Disasters by Final Year High School Students: An International Cross-sectional Survey                                                   | YES | YES | YES |     |     |  |  |  |
| <b>Cohen</b>      | 2017 | Comparison of Simulated Treatment and Cost-effectiveness of a Stepped Care Case-Finding Intervention vs Usual Care for Posttraumatic Stress Disorder After a Natural Disaster | YES | YES | YES |     |     |  |  |  |
| <b>Cui*</b>       | 2018 | Resilience of an Earthquake-Stricken Rural Community in Southwest China: Correlation with Disaster Risk Reduction Efforts                                                     |     | YES | YES |     |     |  |  |  |
| <b>Cvetkovic*</b> | 2018 | The Role of Gender in Preparedness and Response Behaviors towards Flood Risk in Serbia                                                                                        | YES | YES | YES | YES | YES |  |  |  |
| <b>Dahal*</b>     | 2018 | Prevalence and risk factors of post-traumatic stress disorders among the survivors of 2015 Nepal earthquake, in Dhading, Nepal                                                |     | YES | YES |     |     |  |  |  |
| <b>Dai*</b>       | 2016 | The incidence of post-traumatic stress disorder among survivors after earthquakes: a systematic review and meta-analysis                                                      |     | YES | YES |     |     |  |  |  |

|                                                                 |      |                                                                                                                                                                                    |     |     |     |     |     |     |  |     |
|-----------------------------------------------------------------|------|------------------------------------------------------------------------------------------------------------------------------------------------------------------------------------|-----|-----|-----|-----|-----|-----|--|-----|
| <b>Dominey-Howes, D., Gorman-Murray, A., &amp; McKinnon, S.</b> | 2018 | On the disaster experiences of sexualand gender (LGBTI) minorities: insights to support inclusive disaster risk reduction policy and practice                                      | YES | YES | YES | YES |     | YES |  | YES |
| <b>Dorahy*</b>                                                  | 2015 | Impact of average household income and damage exposure on post-earthquake distress and functioning: A community study following the February 2011 Christchurch earthquake          |     |     | YES | YES |     |     |  |     |
| <b>Doyle*</b>                                                   | 2018 | Motivations to prepare after the 2013 Cook Strait Earthquake, N.Z                                                                                                                  |     |     | YES | YES |     |     |  |     |
| <b>Du Na*</b>                                                   | 2019 | Post-traumatic stress disorder and depression symptoms of adolescents survived from a seriously-hit area in China: A 3-year follow-up study                                        |     |     | YES | YES |     |     |  |     |
| <b>Eiser*</b>                                                   | 2015 | Risk perceptions and trust following the 2010 and 2011 Icelandic volcanic ash crises                                                                                               |     |     | YES | YES |     |     |  |     |
| <b>Eisma*</b>                                                   | 2019 | Complicated grief and post-traumatic stress symptom profiles in bereaved earthquake survivors: a latent class analysis                                                             |     |     | YES | YES | YES | YES |  |     |
| <b>Ejeta</b>                                                    | 2018 | Community's Emergency Preparedness for Flood Hazards in Dire-dawa Town, Ethiopia: A Qualitative Study                                                                              |     |     | YES | YES |     |     |  |     |
| <b>Elliot*</b>                                                  | 2017 | Beyond disasters: A longitudinal analysis of natural hazards' unequal impacts on residential instability                                                                           |     |     | YES | YES | YES | YES |  |     |
| <b>Fan*</b>                                                     | 2017 | Association of Val66Met polymorphism at brain derived neurotrophic factor gene with depression among Chinese adolescents after Wenchuan earthquake: An 18months longitudinal study |     |     | YES | YES |     |     |  |     |

|                      |      |                                                                                                                                      |     |     |     |     |     |     |  |  |     |
|----------------------|------|--------------------------------------------------------------------------------------------------------------------------------------|-----|-----|-----|-----|-----|-----|--|--|-----|
| <b>Ferhusson*</b>    | 2015 | Perceptions of distress and positive consequences following exposure to a major disaster amongst a well-studied cohort               |     |     | YES | YES | YES | YES |  |  |     |
| <b>Fernandez*</b>    | 2018 | Factors influencing fire, earthquake, and cyclone risk perception in Yangon, Myanmar                                                 |     |     | YES | YES |     |     |  |  |     |
| <b>Forbes*</b>       | 2015 | The role of anger and ongoing stressors in mental health following a natural disaster                                                |     |     | YES | YES | YES | YES |  |  |     |
| <b>Fox*</b>          | 2017 | Hazard Experience, Geophysical Vulnerability, and Flood Risk Perceptions in a Postdisaster City, the Case of New Orleans             |     |     | YES | YES | YES | YES |  |  |     |
| <b>Frankenberg*</b>  | 2017 | Adult Mortality Five Years after a Natural Disaster                                                                                  |     | YES | YES | YES | YES | YES |  |  |     |
| <b>Fukushi*</b>      | 2018 | Mental and physical stress of the Fukushima disaster evacuees as estimated by the measurement of urinary 8-hydroxy-2'-deoxyguanosine |     |     | YES | YES |     |     |  |  |     |
| <b>Gaillard</b>      | 2017 | Sexual and gender minorities in disaster                                                                                             | YES |     |     |     | YES | YES |  |  |     |
| <b>Gallagher*</b>    | 2017 | Dyadic effects of attachment on mental health: Couples in a postdisaster context                                                     |     |     | YES | YES |     |     |  |  |     |
| <b>Gao*</b>          | 2015 | Health-related quality of life of fracture victims four years after the 2008 Sichuan earthquake                                      |     |     | YES | YES |     |     |  |  |     |
| <b>Garcia</b>        | 2016 | Coping, rumination and posttraumatic growth in people affected by an earthquake                                                      |     |     |     |     | YES | YES |  |  |     |
| <b>Gorman-Murray</b> | 2018 | Listening and learning: giving voice to trans experiences of disasters                                                               | YES |     |     |     | YES | YES |  |  | YES |
| <b>Goryoda</b>       | 2018 | Social Capital and Dietary Intakes Following the 2011 Great East Japan Earthquake and Tsunami                                        |     |     |     |     | YES | YES |  |  |     |
| <b>Greaves</b>       | 2015 | Regional differences in the psychological recovery of                                                                                |     |     |     |     | YES | YES |  |  |     |

|                    |      |                                                                                                                                                   |  |  |     |     |     |     |  |  |
|--------------------|------|---------------------------------------------------------------------------------------------------------------------------------------------------|--|--|-----|-----|-----|-----|--|--|
|                    |      | Christchurch residents following the 2010/2011 earthquakes: a longitudinal study                                                                  |  |  |     |     |     |     |  |  |
| <b>Groves*</b>     | 2017 | Descriptive study of earthquake-related spinal cord injury in Nepal                                                                               |  |  | YES | YES | YES | YES |  |  |
| <b>Guo*</b>        | 2017 | Post-traumatic stress disorder and depression among adult survivors 8 years after the 2008 Wenchuan earthquake in China                           |  |  | YES | YES |     |     |  |  |
| <b>Hall</b>        | 2019 | The association between disaster exposure and media use on post-traumatic stress disorder following Typhoon Hato in Macao, China                  |  |  |     |     | YES | YES |  |  |
| <b>Hamama-Raz*</b> | 2015 | Gender differences in psychological reactions to Hurricane Sandy among New York Metropolitan Area residents                                       |  |  | YES | YES | YES | YES |  |  |
| <b>Han*</b>        | 2019 | Social support moderates association between posttraumatic growth and trauma-related psychopathologies among victims of the Sewol Ferry Disaster  |  |  | YES | YES | YES | YES |  |  |
| <b>Hanaoka</b>     | 2018 | Do risk preferences change? Evidence from the Great East Japan Earthquake                                                                         |  |  |     |     | YES | YES |  |  |
| <b>Hancock</b>     | 2016 | Positive post-disaster images: A daydream machine?                                                                                                |  |  |     |     | YES | YES |  |  |
| <b>Hashimoto</b>   | 2017 | Influence of post-disaster evacuation on incidence of metabolic syndrome                                                                          |  |  |     |     | YES | YES |  |  |
| <b>Hayashi</b>     | 2017 | The impact of evacuation on the incidence of chronic kidney disease after the Great East Japan Earthquake: The Fukushima Health Management Survey |  |  |     |     | YES | YES |  |  |



|                  |      |                                                                                                                                                       |  |  |     |     |     |     |  |  |  |
|------------------|------|-------------------------------------------------------------------------------------------------------------------------------------------------------|--|--|-----|-----|-----|-----|--|--|--|
| <b>Heetkamp*</b> | 2015 | PTSD and resilience in adolescents after New Zealand earthquakes                                                                                      |  |  | YES | YES | YES | YES |  |  |  |
| <b>Heid*</b>     | 2016 | Vulnerable, But Why? Post-Traumatic Stress Symptoms in Older Adults Exposed to Hurricane Sandy                                                        |  |  | YES | YES | YES | YES |  |  |  |
| <b>Helander*</b> | 2016 | Analysis of disaster risk attitudes in situation awareness: A cultural and gender perspective                                                         |  |  | YES | YES | YES | YES |  |  |  |
| <b>Hirani</b>    | 2018 | Breastfeeding in Disaster Relief Camps: An Integrative Review of Literature                                                                           |  |  |     |     |     |     |  |  |  |
| <b>Horikoshi</b> | 2016 | Residence-related factors and psychological distress among evacuees after the Fukushima Daiichi nuclear power plant accident: a cross-sectional study |  |  |     |     | YES | YES |  |  |  |
| <b>Hu*</b>       | 2015 | Recovery from post-traumatic stress disorder after a flood in China: a 13-year follow-up and its prediction by degree of collective action            |  |  | YES | YES |     |     |  |  |  |
| <b>Hu*</b>       | 2018 | Assessment on the burden of bacillary dysentery associated with floods during 2005-2009 in Zhengzhou City, China, using a time-series analysis        |  |  | YES | YES |     |     |  |  |  |
| <b>Huang*</b>    | 2017 | A preliminary report on psychiatric impairments and quality of life among Kaohsiung gas explosion victims 6 months after the event                    |  |  | YES | YES | YES | YES |  |  |  |
| <b>Hudson*</b>   | 2019 | An evaluation and monetary assessment of the impact of flooding on subjective well-being across genders in Vietnam                                    |  |  | YES | YES | YES | YES |  |  |  |
| <b>Hugelius*</b> | 2017 | Facebook Enables Disaster Research Studies: The Use of Social Media to Recruit                                                                        |  |  | YES | YES | YES | YES |  |  |  |

|                  |      |                                                                                                                                              |     |     |     |     |     |     |  |  |
|------------------|------|----------------------------------------------------------------------------------------------------------------------------------------------|-----|-----|-----|-----|-----|-----|--|--|
|                  |      | Participants in a Post-Disaster Setting                                                                                                      |     |     |     |     |     |     |  |  |
| <b>Ibrahim*</b>  | 2019 | Vulnerability to recurrent shocks and disparities in gendered livelihood diversification in remote areas of Nigeria                          |     |     | YES | YES | YES | YES |  |  |
| <b>Igarashi*</b> | 2018 | Long-term outcomes of patients evacuated from hospitals near the Fukushima Daiichi nuclear power plant after the Great East Japan Earthquake |     | YES | YES | YES | YES | YES |  |  |
| <b>Illiyas*</b>  | 2018 | Hazard-centric evacuation experiments - A study on occupant responses to earthquake alarm                                                    |     |     | YES | YES |     |     |  |  |
| <b>Inatomi</b>   | 2017 | Clinical characteristics of patients seizure following the 2016 Kumamoto earthquake                                                          |     | YES | YES | YES |     |     |  |  |
| <b>Inoue*</b>    | 2018 | Gender-Based Risk and Protective Factors for Psychological Distress in the Midterm Recovery Period Following the Great East Japan Earthquake |     | YES | YES | YES | YES | YES |  |  |
| <b>Ishikura*</b> | 2016 | Public Attitudes toward an Epidemiological Study with Genomic Analysis in the Great East Japan Earthquake Disaster Area                      |     | YES | YES | YES | YES | YES |  |  |
| <b>Isik</b>      | 2015 | Are women in Turkey both risks and resources in disaster management?                                                                         | YES |     |     |     | YES | YES |  |  |
| <b>Jamali</b>    | 2018 | Post-disaster place attachment: A qualitative study of place attachment in the wake of the 2013 Moore tornado                                |     |     |     |     | YES | YES |  |  |
| <b>Jang*</b>     | 2017 | Increased beta power in the bereaved families of the Sewol ferry disaster: A paradoxical compensatory phenomenon? A                          |     | YES | YES | YES | YES | YES |  |  |

|                 |      |                                                                                                                                                                   |  |  |            |            |            |            |  |
|-----------------|------|-------------------------------------------------------------------------------------------------------------------------------------------------------------------|--|--|------------|------------|------------|------------|--|
|                 |      | two-channel electroencephalography study                                                                                                                          |  |  |            |            |            |            |  |
| <b>Jeon*</b>    | 2017 | Natural Course of Posttraumatic Symptoms in Late-Adolescent Maritime Disaster Survivors: Results of A 12-Month Follow-Up Study                                    |  |  | <b>YES</b> | <b>YES</b> |            |            |  |
| <b>Jia*</b>     | 2017 | Longitudinal Relationships between Social Support and Posttraumatic Growth among Adolescent Survivors of the Wenchuan Earthquake                                  |  |  | <b>YES</b> | <b>YES</b> |            |            |  |
| <b>Jin</b>      | 2018 | The relationship between PTSD, depression and negative life events: Ya'an earthquake three years later                                                            |  |  |            |            |            |            |  |
| <b>Jonsson*</b> | 2017 | The state of the residential fire fatality problem in Sweden: Epidemiology, risk factors, and event typologies                                                    |  |  | <b>YES</b> | <b>YES</b> |            |            |  |
| <b>Kalina*</b>  | 2016 | A comparison of burn related injuries following the natural disaster Super Storm Hurricane Sandy to the National Burn Repository of the American Burn Association |  |  | <b>YES</b> | <b>YES</b> |            |            |  |
| <b>Kamara*</b>  | 2018 | Resilience to Climate-Induced Disasters and Its Overall Relationship to Well-Being in Southern Africa: A Mixed-Methods Systematic Review                          |  |  | <b>YES</b> | <b>YES</b> | <b>YES</b> | <b>YES</b> |  |
| <b>Kanakis*</b> | 2016 | Preparing for disaster: Preparedness in a flood and cyclone prone community                                                                                       |  |  | <b>YES</b> | <b>YES</b> |            |            |  |
| <b>Kane*</b>    | 2017 | Mental health and psychosocial problems in the aftermath of the Nepal earthquakes: findings from a representative cluster sample survey                           |  |  | <b>YES</b> | <b>YES</b> |            |            |  |
| <b>Kiani</b>    | 2017 | Personal factors affecting ethical performance in healthcare                                                                                                      |  |  |            |            | <b>YES</b> | <b>YES</b> |  |

|                  |      |                                                                                                                                                                                                                |     |     |     |     |     |  |  |  |
|------------------|------|----------------------------------------------------------------------------------------------------------------------------------------------------------------------------------------------------------------|-----|-----|-----|-----|-----|--|--|--|
|                  |      | workers during disasters and mass casualty incidents in Iran: a qualitative study                                                                                                                              |     |     |     |     |     |  |  |  |
| <b>Kiani*</b>    | 2016 | The relationship between timing of admission to a hospital and severity of injuries following 2005 Pakistan earthquake                                                                                         | YES | YES | YES | YES | YES |  |  |  |
| <b>Kpanake*</b>  | 2018 | Haitian people's expectations regarding post-disaster humanitarian aid teams' actions                                                                                                                          |     | YES | YES | YES | YES |  |  |  |
| <b>Krishnan*</b> | 2019 | Water, sanitation and hygiene (WASH) and disaster recovery for community resilience: A mixed methods study from Odisha, India                                                                                  |     | YES | YES | YES | YES |  |  |  |
| <b>Kulkarni*</b> | 2017 | Evacuations as a Result of Hurricane Sandy: Analysis of the 2014 New Jersey Behavioral Risk Factor Survey                                                                                                      |     | YES | YES | YES | YES |  |  |  |
| <b>Kuroda*</b>   | 2017 | Occurrence of depressive tendency and associated social factors among elderly persons forced by the Great East Japan Earthquake and nuclear disaster to live as long-term evacuees: a prospective cohort study |     | YES | YES | YES | YES |  |  |  |
| <b>Labra*</b>    | 2019 | Men's Help-Seeking Attitudes in Rural Communities Affected by a Natural Disaster                                                                                                                               |     | YES | YES | YES | YES |  |  |  |
| <b>Lebowitz</b>  | 2016 | Cross-Sectional Data Within 1 Year of the Fukushima Meltdown: Effect-Size of Predictors for Depression                                                                                                         | YES | YES | YES |     |     |  |  |  |
| <b>Lee*</b>      | 2017 | Factors associated with post-traumatic stress symptoms among adolescents exposed to the Sewol ferry disaster in Korea                                                                                          |     | YES | YES |     |     |  |  |  |
| <b>Lee*</b>      | 2018 | Factors Associated with Post-traumatic Stress Symptoms in Students Who Survived 20                                                                                                                             |     | YES | YES |     |     |  |  |  |

|                  |      |                                                                                                                                                                  |            |            |            |            |            |  |            |  |
|------------------|------|------------------------------------------------------------------------------------------------------------------------------------------------------------------|------------|------------|------------|------------|------------|--|------------|--|
|                  |      | Months after the Sewol Ferry Disaster in Korea                                                                                                                   |            |            |            |            |            |  |            |  |
| <b>Lee*</b>      | 2017 | Social Support as a Mediator of Posttraumatic Embitterment and Perceptions of Meaning in Life among Danwon Survivors of the Sewol Ferry Disaster                 | <b>YES</b> | <b>YES</b> | <b>YES</b> |            |            |  |            |  |
| <b>Lewis</b>     | 2016 | Sustainable development through a gendered lens: climate change adaptation and disaster risk reduction                                                           |            |            |            | <b>YES</b> | <b>YES</b> |  |            |  |
| <b>Li-Tsang*</b> | 2015 | Rehabilitation needs of the survivors of the 2013 Ya'an earthquake in China                                                                                      |            | <b>YES</b> | <b>YES</b> |            |            |  |            |  |
| <b>Li*</b>       | 2015 | Long-term effects of earthquake experience of young persons on cardiovascular disease risk factors                                                               |            | <b>YES</b> | <b>YES</b> |            |            |  |            |  |
| <b>Liddell*</b>  | 2018 | Predictors of Individual Resilience Characteristics Among Individuals Ages 65 and Older in Post-Disaster Settings                                                |            | <b>YES</b> | <b>YES</b> |            |            |  |            |  |
| <b>Lin*</b>      | 2015 | Serological investigation to identify risk factors for post-flood infectious diseases: a longitudinal survey among people displaced by Typhoon Morakot in Taiwan |            | <b>YES</b> | <b>YES</b> |            |            |  |            |  |
| <b>Liu*</b>      | 2015 | Analysis of Risk and Burden of Dysentery Associated with Floods from 2004 to 2010 in Nanning, China                                                              |            | <b>YES</b> | <b>YES</b> |            |            |  |            |  |
| <b>Logie*</b>    | 2016 | My body is mine': Qualitatively exploring agency among internally displaced women participants in a small-group intervention in Leogane, Haiti                   |            | <b>YES</b> | <b>YES</b> | <b>YES</b> | <b>YES</b> |  | <b>YES</b> |  |
| <b>Lowe*</b>     | 2016 | Mental Health Service Need and Use in the Aftermath of Hurricane Sandy: Findings in a                                                                            |            | <b>YES</b> | <b>YES</b> | <b>YES</b> | <b>YES</b> |  |            |  |

|                       |      |                                                                                                                                                                        |            |            |            |            |            |            |  |            |
|-----------------------|------|------------------------------------------------------------------------------------------------------------------------------------------------------------------------|------------|------------|------------|------------|------------|------------|--|------------|
|                       |      | Population-Based Sample of New York City Residents                                                                                                                     |            |            |            |            |            |            |  |            |
| <b>Luo*</b>           | 2016 | A study of farmers' flood perceptions based on the entropy method: an application from Jiangnan Plain, China                                                           |            |            | <b>YES</b> | <b>YES</b> | <b>YES</b> | <b>YES</b> |  |            |
| <b>Maheen</b>         | 2017 | Rural Women's Experience of Living and Giving Birth in Relief Camps in Pakistan                                                                                        |            |            |            |            | <b>YES</b> | <b>YES</b> |  |            |
| <b>Martin-Simpson</b> | 2018 | Measuring the benefits of using market based approaches to provide water and sanitation in humanitarian contexts                                                       |            |            |            |            | <b>YES</b> | <b>YES</b> |  |            |
| <b>Matsumoto</b>      | 2015 | Implications for Social support on prolonged sleep difficulties among a disaster-affected population: Second report from a cross-sectional survey in Ishinomaki, Japan |            | <b>YES</b> | <b>YES</b> | <b>YES</b> |            |            |  |            |
| <b>McKinnon</b>       | 2017 | Disasters, Queer Narratives, and the News: How Are LGBTI Disaster Experiences Reported by the Mainstream and LGBTI Media?                                              | <b>YES</b> |            |            |            | <b>YES</b> | <b>YES</b> |  |            |
| <b>McKinnon</b>       | 2017 | Remembering an epidemic during a disaster: memories of HIV/AIDS, gay male identities and the experience of recent disasters in Australia and New Zealand               | <b>YES</b> |            |            | <b>YES</b> |            | <b>YES</b> |  | <b>YES</b> |
| <b>McKinzie</b>       | 2017 | Deconstruction of destruction stories: narrative, inequality, and disasters*                                                                                           |            |            | <b>YES</b> | <b>YES</b> | <b>YES</b> | <b>YES</b> |  |            |
| <b>McSherry</b>       | 2015 | From Deviant to Bakla, Strong to Stronger: Mainstreaming Sexual and Gender Minorities into Disaster Risk Reduction in the Philippines                                  | <b>YES</b> | <b>YES</b> | <b>YES</b> | <b>YES</b> | <b>YES</b> | <b>YES</b> |  | <b>YES</b> |
| <b>Memon*</b>         | 2018 | Reduced Recovery of Depression in Female T Allele Carriers of TNF-RII rs1061622 at                                                                                     |            |            | <b>YES</b> | <b>YES</b> |            |            |  |            |

|                 |      |                                                                                                                                                                     |     |     |     |     |     |     |  |
|-----------------|------|---------------------------------------------------------------------------------------------------------------------------------------------------------------------|-----|-----|-----|-----|-----|-----|--|
|                 |      | Earlier Stage after Wenchuan Earthquake                                                                                                                             |     |     |     |     |     |     |  |
| <b>Mobula*</b>  | 2016 | Prevalence of Hypertension among Patients Attending Mobile Medical Clinics in the Philippines after Typhoon Haiyan                                                  |     |     | YES | YES | YES | YES |  |
| <b>Modena*</b>  | 2017 | Gender Differences in Post-Traumatic Stress                                                                                                                         | YES | YES | YES | YES | YES |     |  |
| <b>Moise</b>    | 2016 | Hospitalizations for Substance Abuse Disorders Before and After Hurricane Katrina: Spatial Clustering and Area-Level Predictors, New Orleans, 2004 and 2008         | YES |     |     | YES | YES |     |  |
| <b>Montano*</b> | 2016 | Rethinking our approach to gender and disasters: Needs, responsibilities, and solutions                                                                             |     |     | YES |     | YES | YES |  |
| <b>Mordeno*</b> | 2016 | Examining the Latent Structure of Posttraumatic Growth Between Male and Female Survivors in the Immediate Aftermath of a Flash Flood Disaster                       | YES | YES | YES | YES | YES | YES |  |
| <b>Morita*</b>  | 2018 | Demographic transition and factors associated with remaining in place after the 2011 Fukushima nuclear disaster and related evacuation orders                       | YES | YES | YES | YES | YES | YES |  |
| <b>Morita*</b>  | 2017 | Excess mortality due to indirect health effects of the 2011 triple disaster in Fukushima, Japan: a retrospective observational study                                | YES | YES | YES | YES | YES | YES |  |
| <b>Moriyama</b> | 2018 | Efficacy of group intervention involving physical activity on subjective well-being of elderly returnees after evacuation following the Great East Japan Earthquake |     |     |     | YES | YES |     |  |

|                   |      |                                                                                                                                                                                         |     |     |     |     |     |     |  |     |
|-------------------|------|-----------------------------------------------------------------------------------------------------------------------------------------------------------------------------------------|-----|-----|-----|-----|-----|-----|--|-----|
| <b>Moriyama*</b>  | 2017 | Effect of Residence in Temporary Housing After the Great East Japan Earthquake on the Physical Activity and Quality of Life of Older Survivors                                          |     | YES | YES | YES | YES | YES |  |     |
| <b>Mulligan*</b>  | 2015 | How did the Canterbury earthquakes affect physiotherapists and physiotherapy services? A qualitative study                                                                              |     | YES | YES | YES | YES | YES |  |     |
| <b>Myers*</b>     | 2018 | Facilitators and barriers in implementing the Minimum Initial Services Package (MISP) for reproductive health in Nepal post-earthquake                                                  | YES |     | YES | YES | YES | YES |  | YES |
| <b>N.Sattler*</b> | 2018 | Natural Disasters in Indonesia: Relationships Among Posttraumatic Stress, Resource Loss, Depression, Social Support, and Posttraumatic Growth                                           |     |     | YES | YES | YES | YES |  |     |
| <b>Nagai*</b>     | 2018 | Impact of evacuation on trends in the prevalence, treatment, and control of hypertension before and after a disaster                                                                    |     | YES | YES | YES | YES | YES |  |     |
| <b>Nagai*</b>     | 2017 | Lifestyle-related factors that explain disaster-induced changes in socioeconomic status and poor subjective health: A cross-sectional study from the Fukushima health management survey |     | YES |     |     | YES | YES |  |     |
| <b>Nagashim*</b>  | 2018 | Changes in pulmonary function of residents in Sanriku Seacoast following the tsunami disaster from the Great East Japan Earthquake                                                      |     |     | YES | YES | YES | YES |  |     |
| <b>Najafi*</b>    | 2015 | Demographic Determinants of Disaster Preparedness Behaviors                                                                                                                             |     |     | YES | YES |     |     |  |     |



|                  |      | Amongst Tehran Inhabitants,<br>Iran                                                                                                                                       |     |     |     |     |     |  |  |  |  |
|------------------|------|---------------------------------------------------------------------------------------------------------------------------------------------------------------------------|-----|-----|-----|-----|-----|--|--|--|--|
| <b>Nakano*</b>   | 2018 | Associations of disaster-related and psychosocial factors with changes in smoking status after a disaster: A cross-sectional survey after the Great East Japan Earthquake | YES | YES | YES | YES | YES |  |  |  |  |
| <b>Nakaya*</b>   | 2016 | Partners' Ongoing Treatment for Chronic Disease and the Risk of Psychological Distress after the Great East Japan Earthquake                                              | YES | YES | YES | YES | YES |  |  |  |  |
| <b>Nakhaei*</b>  | 2015 | Impact of disaster on women in Iran and implication for emergency nurses volunteering to provide urgent humanitarian aid relief: A qualitative study                      |     | YES | YES |     |     |  |  |  |  |
| <b>Naseri*</b>   | 2017 | A primary assessment of society-based earthquake disaster mitigation in Kabul city, Afghanistan                                                                           |     | YES | YES |     |     |  |  |  |  |
| <b>Nazhat*</b>   | 2016 | Sexual and gender-based violence in natural disasters: Emerging norms                                                                                                     |     | YES | YES | YES | YES |  |  |  |  |
| <b>Ni*</b>       | 2015 | Factors associated with resilience of adult survivors five years after the 2008 Sichuan earthquake in China                                                               |     | YES | YES | YES | YES |  |  |  |  |
| <b>Nishat*</b>   | 2018 | Disaster, vulnerability, and violence against women: Global findings and a research agenda for bangladesh                                                                 |     | YES | YES | YES | YES |  |  |  |  |
| <b>Nobakht*</b>  | 2019 | Risk factors of post-traumatic stress among survivors of the 2017 Iran earthquake: The importance of peritraumatic dissociation                                           |     | YES |     | YES | YES |  |  |  |  |
| <b>Nonnecke*</b> | 2017 | Malasakit 1.0: A participatory online platform for crowdsourcing disaster risk                                                                                            |     | YES | YES | YES |     |  |  |  |  |

|                   |      |                                                                                                                                                                                                                                         |     |     |     |     |     |     |     |
|-------------------|------|-----------------------------------------------------------------------------------------------------------------------------------------------------------------------------------------------------------------------------------------|-----|-----|-----|-----|-----|-----|-----|
|                   |      | reduction strategies in the philippines                                                                                                                                                                                                 |     |     |     |     |     |     |     |
| <b>Nozue*</b>     | 2017 | Combined associations of physical activity and dietary intake with health status among survivors of the Great East Japan Earthquake                                                                                                     |     | YES | YES | YES | YES | YES |     |
| <b>O'Connell*</b> | 2017 | Emotions and beliefs after a disaster: a comparative analysis of Haiti and Indonesia                                                                                                                                                    |     | YES | YES |     |     |     |     |
| <b>Oe*</b>        | 2016 | Three-year trend survey of psychological distress, post-traumatic stress, and problem drinking among residents in the evacuation zone after the Fukushima Daiichi Nuclear Power Plant accident [The Fukushima Health Management Survey] |     | YES | YES | YES | YES | YES |     |
| <b>Ohira*</b>     | 2016 | Evacuation and risk of hypertension after the great East Japan Earthquake                                                                                                                                                               |     | YES |     | YES | YES | YES |     |
| <b>Ohira*</b>     | 2016 | Effect of evacuation on body weight after the Great East Japan Earthquake                                                                                                                                                               |     | YES |     |     | YES | YES |     |
| <b>Ohman*</b>     | 2016 | The (un)intended consequences of crisis communication in news media: a critical analysis                                                                                                                                                |     | YES | YES | YES | YES | YES |     |
| <b>Ong*</b>       | 2017 | Queer cosmopolitanism in the disaster zone: 'My Grindr became the United Nations'                                                                                                                                                       | YES | YES | YES | YES | YES | YES | YES |
| <b>Onose*</b>     | 2017 | Sex differences in post-traumatic stress disorder in cardiovascular patients after the Great East Japan Earthquake: A report from the CHART-2 Study                                                                                     |     | YES | YES | YES | YES | YES |     |
| <b>Orui*</b>      | 2015 | Delayed increase in male suicide rates in tsunami disaster-stricken areas following the great east japan earthquake: a                                                                                                                  |     | YES | YES | YES | YES | YES |     |

|                   |      |                                                                                                                                                                                              |     |     |     |     |     |  |  |     |
|-------------------|------|----------------------------------------------------------------------------------------------------------------------------------------------------------------------------------------------|-----|-----|-----|-----|-----|--|--|-----|
|                   |      | three-year follow-up study in Miyagi Prefecture                                                                                                                                              |     |     |     |     |     |  |  |     |
| <b>Orui*</b>      | 2018 | Suicide Rates in Evacuation Areas After the Fukushima Daiichi Nuclear Disaster                                                                                                               | YES | YES | YES | YES | YES |  |  |     |
| <b>Oxfam*</b>     | 2018 | Gender, disaster risk reduction, and climate change adaptation: A learning companion                                                                                                         |     | YES | YES | YES | YES |  |  | YES |
| <b>Ozoilo*</b>    | 2016 | Experience in the management of the mass casualty from the January 2010 Jos Crisis                                                                                                           |     | YES | YES |     |     |  |  |     |
| <b>Paraskevo*</b> | 2018 | Post-fire attitudes and perceptions of people towards the landscape character and development in the rural Peloponnese, a case study of the traditional village of Leontari, Arcadia, Greece |     |     | YES | YES | YES |  |  |     |
| <b>Parkinson*</b> | 2017 | Investigating the Increase in Domestic Violence Post Disaster: An Australian Case Study                                                                                                      |     |     | YES | YES | YES |  |  |     |
| <b>Parkinson*</b> | 2015 | Victoria's gender and disaster taskforce                                                                                                                                                     | YES | YES | YES | YES | YES |  |  |     |
| <b>Pathak*</b>    | 2017 | Gendered approach towards disaster recovery: Experiences from 2011 floods in Pathumthani province, Thailand                                                                                  |     | YES | YES | YES | YES |  |  |     |
| <b>Paul*</b>      | 2015 | Predictors of compliance with tornado warnings issued in Joplin, Missouri, in 2011                                                                                                           |     | YES | YES | YES | YES |  |  |     |
| <b>Paul*</b>      | 2018 | Fatalities caused by hydrometeorological disasters in texas                                                                                                                                  |     | YES | YES | YES | YES |  |  |     |
| <b>Payari*</b>    | 2016 | Sex differentials in the risk factors of post traumatic stress disorder among tsunami survivors in Tamil Nadu, India                                                                         | YES | YES | YES | YES | YES |  |  |     |
| <b>Peden</b>      | 2018 | The Flood-Related Behaviour of River Users in Australia                                                                                                                                      |     | YES | YES |     |     |  |  |     |
| <b>Petrucci*</b>  | 2017 | The Vulnerability of People to Damaging Hydrogeological                                                                                                                                      |     | YES | YES |     |     |  |  |     |

|                   |      |                                                                                                                                                     |     |  |     |     |     |     |  |
|-------------------|------|-----------------------------------------------------------------------------------------------------------------------------------------------------|-----|--|-----|-----|-----|-----|--|
|                   |      | Events in the Calabria Region (Southern Italy)                                                                                                      |     |  |     |     |     |     |  |
| <b>Piccardi*</b>  | 2018 | Continuous Environmental Changes May Enhance Topographic Memory Skills. Evidence From L'Aquila Earthquake-Exposed Survivors                         |     |  | YES | YES |     |     |  |
| <b>Pledger</b>    | 2019 | SF-12 indicators of health following the 22 February 2011 Christchurch earthquake                                                                   |     |  |     |     | YES | YES |  |
| <b>Pollack*</b>   | 2016 | Mental health, life functioning and risk factors among people exposed to frequent natural disasters and chronic poverty in Vietnam                  |     |  | YES | YES | YES | YES |  |
| <b>Rakhshan*</b>  | 2017 | Social support for earthquake victims in East Azerbaijan, Iran                                                                                      |     |  | YES | YES | YES | YES |  |
| <b>Rashidine*</b> | 2015 | General Health Among Parents Who Lost Their Children in the Bam Earthquake                                                                          |     |  | YES | YES | YES | YES |  |
| <b>Reid*</b>      | 2016 | Differential respiratory health effects from the 2008 northern California wildfires: A spatiotemporal approach                                      | YES |  | YES | YES | YES | YES |  |
| <b>Reyes*</b>     | 2017 | Gender dimensions and women's vulnerability in disaster situations: A case study of flood prone areas impacting women in Malabon City, Metro Manila |     |  | YES | YES | YES | YES |  |
| <b>Sado*</b>      | 2018 | Three-Year Follow-up After the Great East Japan Earthquake in the Incidence of Out-of-Hospital Cardiac Arrest With Cardiac Origin                   | YES |  | YES | YES | YES | YES |  |
| <b>Sakai*</b>     | 2017 | Persistent prevalence of polycythemia among evacuees 4 years after the Great East Japan Earthquake: A follow-up study                               | YES |  |     |     | YES | YES |  |
| <b>Sakai</b>      | 2015 | White blood cell, neutrophil, and lymphocyte counts in                                                                                              |     |  |     |     | YES | YES |  |

|                 |      |                                                                                                                                                                                  |            |            |            |            |            |            |  |  |
|-----------------|------|----------------------------------------------------------------------------------------------------------------------------------------------------------------------------------|------------|------------|------------|------------|------------|------------|--|--|
|                 |      | individuals in the evacuation zone designated by the government after the Fukushima Daiichi Nuclear Power Plant accident: the Fukushima Health Management Survey                 |            |            |            |            |            |            |  |  |
| <b>Salvati</b>  | 2018 | Gender, age and circumstances analysis of flood and landslide fatalities in Italy                                                                                                |            |            |            |            | <b>YES</b> | <b>YES</b> |  |  |
| <b>Satoh*</b>   | 2015 | Evacuation after the Fukushima Daiichi Nuclear Power Plant Accident Is a Cause of Diabetes: Results from the Fukushima Health Management Survey                                  |            | <b>YES</b> | <b>YES</b> | <b>YES</b> | <b>YES</b> | <b>YES</b> |  |  |
| <b>Satoh*</b>   | 2016 | Hypo-high-density Lipoprotein Cholesterolemia Caused by Evacuation after the Fukushima Daiichi Nuclear Power Plant Accident: Results from the Fukushima Health Management Survey |            |            | <b>YES</b> | <b>YES</b> | <b>YES</b> | <b>YES</b> |  |  |
| <b>Scott</b>    | 2017 | Sex estimation from measurements of the calcaneus: Applications for personal identification in Thailand                                                                          | <b>YES</b> | <b>YES</b> | <b>YES</b> |            |            |            |  |  |
| <b>Sevimli*</b> | 2015 | Health professionals of emergency service: An evaluation of disaster medicine and ethical values                                                                                 |            | <b>YES</b> | <b>YES</b> | <b>YES</b> |            |            |  |  |
| <b>Sevilmi</b>  | 2016 | Issues affecting health professionals during and after catastrophic earthquakes in Van-Turkey                                                                                    |            |            |            | <b>YES</b> | <b>YES</b> |            |  |  |
| <b>Shapira*</b> | 2016 | An Integrated and Interdisciplinary Model for Predicting the Risk of Injury and Death in Future Earthquakes                                                                      |            | <b>YES</b> |            |            |            |            |  |  |
| <b>Sharifi*</b> | 2015 | The severity of cutaneous leishmaniasis before and after the earthquake in Bam, southeastern Iran                                                                                |            | <b>YES</b> | <b>YES</b> |            |            |            |  |  |

|                   |      |                                                                                                                                                                                |  |  |     |     |     |     |  |  |  |
|-------------------|------|--------------------------------------------------------------------------------------------------------------------------------------------------------------------------------|--|--|-----|-----|-----|-----|--|--|--|
| <b>Sheikhbar*</b> | 2017 | Rehabilitation of vulnerable groups in emergencies and disasters: A systematic review                                                                                          |  |  | YES |     | YES | YES |  |  |  |
| <b>Sherman*</b>   | 2017 | Emergency Preparedness Safety Climate and Other Factors Associated With Mental Health Outcomes Among World Trade Center Disaster Evacuees                                      |  |  | YES | YES |     |     |  |  |  |
| <b>Shi *</b>      | 2018 | Posttraumatic stress disorder symptoms in parents and adolescents after the Wenchuan earthquake: A longitudinal actor-partner interdependence model                            |  |  | YES | YES |     |     |  |  |  |
| <b>Shieh</b>      | 2019 | Rate of psychiatric disorders and associations with quality of life among community members following the Kaohsiung gas explosion: an 18-month cross-sectional follow-up study |  |  | YES | YES |     |     |  |  |  |
| <b>Shooshtar*</b> | 2018 | The mental health needs of women in natural disasters: A qualitative study with a preventive approach                                                                          |  |  | YES | YES | YES |     |  |  |  |
| <b>Shrestha*</b>  | 2015 | Post-traumatic Stress Disorder among Medical Personnel after Nepal earthquake, 2015                                                                                            |  |  | YES | YES | YES |     |  |  |  |
| <b>Shreve*</b>    | 2016 | Conceptualizing an equitable "social framing" for economic evaluations to support gender equality in disaster risk- and environmental-management decision-making               |  |  | YES | YES | YES | YES |  |  |  |
| <b>Sloand*</b>    | 2015 | Barriers and Facilitators to Engaging Communities in Gender-Based Violence Prevention following a Natural Disaster                                                             |  |  | YES | YES | YES | YES |  |  |  |
| <b>Smadi</b>      | 2016 | Women's oral and dental health aspects in humanitarian                                                                                                                         |  |  |     |     | YES |     |  |  |  |

|                      |      |                                                                                                                                          |  |  |     |     |     |     |     |  |
|----------------------|------|------------------------------------------------------------------------------------------------------------------------------------------|--|--|-----|-----|-----|-----|-----|--|
|                      |      | missions and disasters:<br>Jordanian experience                                                                                          |  |  |     |     |     |     |     |  |
| <b>Smith*</b>        | 2016 | Thriving after trauma:<br>Posttraumatic growth following<br>the Canterbury earthquake<br>sequence                                        |  |  | YES | YES | YES | YES |     |  |
| <b>Smith*</b>        | 2017 | In some strange way, trouble is<br>good for people. Posttraumatic<br>growth following the<br>Canterbury earthquake sequence              |  |  | YES | YES | YES | YES |     |  |
| <b>Sobrabizadeh*</b> | 2016 | A Qualitative Study of Violence<br>Against Women after the Recent<br>Disasters of Iran                                                   |  |  | YES | YES | YES | YES | YES |  |
| <b>Sobrabizadeh*</b> | 2017 | Women's Challenges and<br>Capabilities in Disasters: A Case<br>Report of the Twin Earthquakes<br>of Eastern Azerbaijan, Iran             |  |  | YES | YES | YES | YES |     |  |
| <b>Sobrabizadeh*</b> | 2018 | Religiosity, Gender, and Natural<br>Disasters: A Qualitative Study of<br>Disaster-Stricken Regions in Iran                               |  |  | YES | YES | YES | YES |     |  |
| <b>Sobrabizadeh*</b> | 2016 | Women and health<br>consequences of natural<br>disasters: Challenge or<br>opportunity?                                                   |  |  | YES | YES | YES | YES |     |  |
| <b>Somerfeldt*</b>   | 2015 | Disasters and Information<br>Source Repertoires: Information<br>Seeking and Information<br>Sufficiency in Postearthquake<br>Haiti        |  |  | YES | YES | YES | YES |     |  |
| <b>Stewart*</b>      | 2017 | Rural Community Disaster<br>Preparedness and Risk<br>Perception in Trujillo, Peru                                                        |  |  | YES | YES | YES |     |     |  |
| <b>Stewart*</b>      | 2017 | Psychological Distress and Zika,<br>Dengue and Chikungunya<br>Symptoms Following the 2016<br>Earthquake in Bahia de<br>Caraquez, Ecuador |  |  | YES | YES | YES | YES |     |  |
| <b>Sthapit*</b>      | 2015 | Gendered impacts of the<br>earthquake and responses in<br>Nepal                                                                          |  |  |     | YES | YES |     |     |  |

|                   |      |                                                                                                                                                                   |  |  |  |     |     |     |     |  |  |  |
|-------------------|------|-------------------------------------------------------------------------------------------------------------------------------------------------------------------|--|--|--|-----|-----|-----|-----|--|--|--|
| <b>Suzuki*</b>    | 2015 | Increased prevalence of atrial fibrillation after the Great East Japan Earthquake: Results from the Fukushima Health Management Survey                            |  |  |  |     | YES | YES | YES |  |  |  |
| <b>Suzuki</b>     | 2017 | Burnout among public servants after the Great East Japan Earthquake: decomposing the construct aftermath of disaster                                              |  |  |  |     |     | YES | YES |  |  |  |
| <b>Takahashi*</b> | 2017 | Effect of evacuation on liver function after the Fukushima Daiichi Nuclear Power Plant accident: The Fukushima Health Management Surve                            |  |  |  | YES | YES | YES | YES |  |  |  |
| <b>Takahashi*</b> | 2016 | Weight Gain in Survivors Living in Temporary Housing in the Tsunami-Stricken Area during the Recovery Phase following the Great East Japan Earthquake and Tsunami |  |  |  | YES | YES |     |     |  |  |  |
| <b>Takeda*</b>    | 2016 | Determinants of intention to leave among non-medical employees after a nuclear disaster: a cross-sectional study                                                  |  |  |  |     | YES | YES | YES |  |  |  |
| <b>Tan*</b>       | 2017 | Disaster Preparedness Among University Students in Guangzhou, China: Assessment of Status and Demand for Disaster Education                                       |  |  |  | YES | YES |     |     |  |  |  |
| <b>Tayfur</b>     | 2018 | Health results of a coup attempt: evaluation of all patients admitted to hospitals in Istanbul due to injuries sustained during the July 15, 2016 coup attempt    |  |  |  | YES | YES |     |     |  |  |  |
| <b>Tempest</b>    | 2017 | Secondary stressors are associated with probable psychological morbidity after flooding: a cross-sectional analysis                                               |  |  |  |     |     | YES | YES |  |  |  |
| <b>Teramoto</b>   | 2015 | Cross-sectional study of social support and psychological                                                                                                         |  |  |  |     |     | YES | YES |  |  |  |



|                     |      |                                                                                                                                                                                       |     |  |     |     |     |     |  |     |
|---------------------|------|---------------------------------------------------------------------------------------------------------------------------------------------------------------------------------------|-----|--|-----|-----|-----|-----|--|-----|
|                     |      | distress among displaced earthquake survivors in Japan                                                                                                                                |     |  |     |     |     |     |  |     |
| <b>Thapa*</b>       | 2019 | Gender inclusiveness in disaster risk governance for sustainable recovery of 2015 Gorkha Earthquake, Nepal                                                                            |     |  | YES | YES | YES | YES |  |     |
| <b>Thoresen*</b>    | 2019 | Long-term mental health and social support in victims of disaster: comparison with a general population sample                                                                        |     |  | YES | YES | YES | YES |  |     |
| <b>Trumble*</b>     | 2018 | Parental hormones are associated with crop loss and family sickness following catastrophic flooding in lowland Bolivia                                                                |     |  | YES | YES | YES | YES |  |     |
| <b>Tsubota*</b>     | 2018 | Association between health risks and frailty in relation to the degree of housing damage among elderly survivors of the great East Japan earthquake                                   |     |  | YES | YES | YES | YES |  |     |
| <b>Tucker*</b>      | 2017 | Possible link of Interleukin-6 and Interleukin-2 with psychiatric diagnosis, ethnicity, disaster or BMI                                                                               |     |  | YES | YES |     |     |  |     |
| <b>Tyler*</b>       | 2018 | Gender, households, and decision-making for wildfire safety                                                                                                                           | YES |  | YES | YES |     |     |  |     |
| <b>Uemura</b>       | 2016 | Association between psychological distress and dietary intake among evacuees after the Great East Japan Earthquake in a cross-sectional study: The Fukushima Health Management Survey |     |  |     |     | YES | YES |  |     |
| <b>Urbatsch</b>     | 2016 | Judgement days: Moral attitudes in the wake of local disasters                                                                                                                        |     |  |     |     |     |     |  | YES |
| <b>Urmson*</b>      | 2016 | Asking for help and receiving support after a disaster                                                                                                                                |     |  | YES | YES | YES | YES |  |     |
| <b>van Berlaer*</b> | 2018 | Clinical Characteristics of the 2013 Haiyan Typhoon Victims                                                                                                                           |     |  | YES | YES |     |     |  |     |

|                     |      |                                                                                                                                                                                                          |            |            |            |            |            |            |  |  |
|---------------------|------|----------------------------------------------------------------------------------------------------------------------------------------------------------------------------------------------------------|------------|------------|------------|------------|------------|------------|--|--|
|                     |      | Presenting to the Belgian First Aid and Support Team                                                                                                                                                     |            |            |            |            |            |            |  |  |
| <b>Wang*</b>        | 2017 | Assessment of the Public Health Risks and Impact of a Tornado in Funing, China, 23 June 2016: A Retrospective Analysis                                                                                   |            |            | <b>YES</b> | <b>YES</b> | <b>YES</b> |            |  |  |
| <b>Wang*</b>        | 2015 | Assessing the underlying dimensionality of DSM-5 PTSD symptoms in Chinese adolescents surviving the 2008 Wenchuan earthquake                                                                             |            |            | <b>YES</b> | <b>YES</b> |            |            |  |  |
| <b>Weiss*</b>       | 2018 | Chernobyl Thyroid Cancer: 30 Years of Follow-up Overview                                                                                                                                                 |            |            | <b>YES</b> | <b>YES</b> |            |            |  |  |
| <b>Wen *</b>        | 2018 | Gender Differences in Psychosocial and Physical Outcomes in Haitian Amputees                                                                                                                             |            |            | <b>YES</b> | <b>YES</b> | <b>YES</b> | <b>YES</b> |  |  |
| <b>Wisner</b>       | 2017 | We've seen the future, and it's very diverse: beyond gender and disaster in West Hollywood, California                                                                                                   | <b>YES</b> | <b>YES</b> | <b>YES</b> | <b>YES</b> | <b>YES</b> | <b>YES</b> |  |  |
| <b>Witvorapong*</b> | 2015 | Social Participation and Disaster Risk Reduction Behaviors in Tsunami Prone Areas                                                                                                                        |            |            | <b>YES</b> |            | <b>YES</b> | <b>YES</b> |  |  |
| <b>Wu*</b>          | 2015 | A cross-sectional survey on the health status and the health-related quality of life of the elderly after flood disaster in Bazhong city, Sichuan, China                                                 |            | <b>YES</b> | <b>YES</b> | <b>YES</b> | <b>YES</b> | <b>YES</b> |  |  |
| <b>Yabuki*</b>      | 2015 | Pain, quality of life and activity in aged evacuees living in temporary housing after the Great East Japan earthquake of 11 March 2011: a cross-sectional study in Minamisoma City, Fukushima prefecture |            |            | <b>YES</b> | <b>YES</b> | <b>YES</b> | <b>YES</b> |  |  |
| <b>Yamashita</b>    | 2015 | Segregation, exclusion and LGBT people in disaster impacted areas: experiences from the Higashinihon Dai-Shinsai (Great East-Japan Disaster)                                                             | <b>YES</b> |            | <b>YES</b> | <b>YES</b> | <b>YES</b> | <b>YES</b> |  |  |

|                   |      |                                                                                                                                                |  |     |     |     |     |     |     |     |  |
|-------------------|------|------------------------------------------------------------------------------------------------------------------------------------------------|--|-----|-----|-----|-----|-----|-----|-----|--|
| <b>Yang*</b>      | 2017 | Understanding the Outcome in the Chinese Changjiang Disaster in 2015: A Retrospective Study                                                    |  |     | YES | YES | YES | YES |     |     |  |
| <b>Yoshihama</b>  | 2018 | Participatory Investigation of the Great East Japan Disaster: PhotoVoice from Women Affected by the Calamity                                   |  |     |     |     | YES |     |     |     |  |
| <b>Yoshihama*</b> | 2018 | Violence Against Women and Children Following the 2011 Great East Japan Disaster: Making the Invisible Visible Through Research                |  |     | YES | YES | YES | YES | YES | YES |  |
| <b>Yoshimura*</b> | 2016 | Relationships between social factors and physical activity among elderly survivors of the Great East Japan earthquake: a cross-sectional study |  | YES | YES | YES | YES | YES |     |     |  |
| <b>Young*</b>     | 2017 | Sex, gender, and disasters: Experimental evidence on the decision to invest in resilience                                                      |  | YES | YES | YES | YES | YES |     |     |  |
| <b>Yu *</b>       | 2016 | Evaluation of blast injury patients from the 2015 Tianjin explosions in China                                                                  |  |     | YES | YES | YES | YES |     |     |  |
| <b>Yumarni *</b>  | 2018 | Gender mainstreaming and sustainable development goals: A systematic literature review in post disaster reconstruction area                    |  |     | YES | YES | YES | YES |     |     |  |
| <b>Yumarni *</b>  | 2018 | Gender mainstreaming as a strategy to achieve sustainable post-disaster reconstruction                                                         |  |     | YES | YES | YES | YES |     |     |  |
| <b>Yumarni</b>    | 2017 | Resource capability of local governments in mainstreaming gender into disaster risk reduction: Evidence from bantul Indonesia                  |  |     |     |     | YES | YES |     |     |  |
| <b>Zagheni*</b>   | 2015 | Differential mortality patterns from hydro-meteorological disasters: Evidence from cause-of-death data by age and sex                          |  | YES | YES | YES | YES | YES |     |     |  |
| <b>Zahlawi*</b>   | 2019 | Psychosocial support during displacement due to a natural                                                                                      |  |     | YES |     | YES | YES |     |     |  |

|                |      |                                                                                                                                                               |  |  |            |            |  |  |  |
|----------------|------|---------------------------------------------------------------------------------------------------------------------------------------------------------------|--|--|------------|------------|--|--|--|
|                |      | disaster: relationships with distress in a lower-middle income country                                                                                        |  |  |            |            |  |  |  |
| <b>Zengin*</b> | 2015 | Fire disaster caused by LPG tanker explosion at Lice in Diyarbakır (Turkey): July 21, 2014                                                                    |  |  | <b>YES</b> | <b>YES</b> |  |  |  |
| <b>Zengin*</b> | 2015 | How was Felt Van Earthquake by a Neighbor University Hospital?                                                                                                |  |  | <b>YES</b> | <b>YES</b> |  |  |  |
| <b>Zhang*</b>  | 2015 | Risk Factors of Posttraumatic Stress Disorder among Survivors after the 512 Wenchuan Earthquake in China                                                      |  |  | <b>YES</b> | <b>YES</b> |  |  |  |
| <b>Zhang*</b>  | 2015 | A Cross-sectional Study on Posttraumatic Stress Disorder and General Psychiatric Morbidity Among Adult Survivors 3 Years After the Wenchuan Earthquake, China |  |  | <b>YES</b> | <b>YES</b> |  |  |  |
